# Supplementary material for: CADBURE: A generic tool to evaluate the performance of spliced aligners on RNA-Seq data
Source: Sci Rep. 2015 Aug 25;5:13443. doi: 10.1038/srep13443 (PMC4548254; doi:10.1038/srep13443)
Supplement: Supplementary Information [file srep13443-s1.pdf]

## Supplemental Information

*for*

**CADBURE: A generic tool to evaluate the performance of spliced aligners on RNA-Seq data.**

Praveen Kumar Raj Kumar, Thanh V. Hoang, Michael L. Robinson, Panagiotis A. Tsonis, Chun Liang

### Contents

|                                             |    |
|---------------------------------------------|----|
| 1. Supplemental Results and Discussion..... | 1  |
| 2. Supplemental Methods.....                | 3  |
| 3. Supplemental References .....            | 5  |
| 4. Supplemental Tables.....                 | 7  |
| 5. Supplemental Figures.....                | 17 |

## 1. Supplemental Results and Discussion

### *Evaluation of methods used for RNA-Seq based differential expression analysis*

The absolute value of gene expression counts were obtained from the optimal alignment result selected by CADBURE. Since CLC Genomics Workbench forbids the use of third party alignment results for RNA-Seq analysis, the CLC unique mapping results with maximum 2 mismatches provided the gene expression result for both the CLC versions of the Baggerley test (version 6.5.1) and EDGE (version 7.0), the latter being similar to that used in edgeR<sup>1</sup>. For DESeq and DESeq2, the count of reads mapped to genic regions were estimated using HTSeq<sup>2</sup> package. For Cuffdiff2, we followed the procedure described elsewhere<sup>3</sup>.

As shown in Supplemental Figure S4, out of the five methods, CLC's Baggerley test predicted the most differentially expressed genes (DEGs) (i.e., 7,481 genes, with adjusted p value < 0.01 and fold change  $\geq 2$ ). This was followed by DESeq2 with 5,152 DEGs, CLC's EDGE with 4,991 DEGs, Cuffdiff2 with 4,165 DEGs and finally DESeq with only 1,856 DEGs. DESeq contained the most commonly shared DEGs (99.62%, shared by all 5 methods), whereas CLC's Baggerley contained the lowest number of shared DEGs (43.26%; Supplemental Fig. S4). For DEGs shared by two methods, DESeq2 and CLC's EDGE shared the most number of DEGs (i.e., 4,332 genes), followed by DESeq2 and Cuffdiff2 sharing 2,989 DEGs (for a full list see Supplemental Table S9). Even though DESeq predicted only 1,856 DEGs (adjusted p value < 0.01 and Fold change  $\geq 2$ ), 1,831 of these DEGs are shared with DESeq2 (Supplemental Fig. S4; Supplemental Table S9). When comparing sets of three methods, DESeq2, CLC's EDGE and Cuffdiff2 shared the most number of DEGs (i.e., 2,754 genes) and the least number of shared DEGs for three methods is among Cuffdiff2, CLC's Baggerley and DESeq (i.e., 413 genes; Supplemental Fig. S4 and Supplemental Table S9).

### *Performance assessment using receiver operating characteristic (ROC) curve for differentially expressed gene detection*

The prediction performance and ability of each method were then evaluated in terms of the tradeoff between specificity and sensitivity. The calculation of specificity and sensitivity depends on the estimation of true-positive (TP), true-negative (TN), false-positive (FP) and false-negative (FN) genes among the predicted DEGs. The formula established by De Smet et al<sup>4</sup> and Storey and Tibshirani<sup>5</sup> permitted the identification of TP, FP, TN and FN among the DEGs as had originally been described for microarray experiments (details in methods). This formula involves

finding  $\lambda$ , which is described as the point after which the adjusted p-values becomes uniformly distributed. In short, this means the point after which none of the genes can be identified as a DEG significantly. In our study, we observed noises (peak at high p value) in the distribution for all tested methods except DESeq2. Hence, we removed high p-value peaks to find the p values uniformly distributed after 0.2, which forms our  $\lambda$  estimation. With this, we calculated the sensitivity (also called the true-positive rate) and specificity (1-specificity is called false-positive rate). Plotting the true-positive rate against false-positive rate at all possible rejection levels  $\alpha = p_i$  (where i goes from 0 to 1 ) is called ROC (Receiver operating characteristic) curve<sup>6</sup>. A ROC curve reveals the tradeoff between true-positive rates and false-positive rates, which here is significantly highest for DESeq, followed by DESeq2, CLC's EDGE, Baggerely, and Cuffdiff2 (Supplemental Fig. S5 a). The area under the ROC (AUC) curve was computed with the trapezoid equation and was significantly higher for DESeq compared to the other methods (Supplemental Fig. S5 a). This suggests that there is better balance between true-positive rate and false-positive rate in DESeq versus the other methods with our data sets. To find the error rate for the AUC, we computed the error for five different fold changes 1.5, 1.75, 2, 2.25, and 2.5 (Supplemental Fig. S5 b). The result confirmed that DESeq performs better in comparison with other methods at all fold change levels. Surprisingly, the earlier version of DESeq exhibited a better balance between the true-positive rate and false-positive rate in comparison to the recently updated DESeq2, after noise (peaks at high p-value 1, 0.88-0.89) removal for DESeq. Even though CLC's Baggerley test revealed the highest number of potential false positives among five tools (Supplemental Fig. S4), the Baggerley test's AUC exceeded that of Cuffdiff2 (Supplemental Fig. S5 a). This may reflect the Baggerley test's better balance with more true positives. Cuffdiff2 performed the worst in comparison to other methods evaluated in terms of balance between the true-positive rate and false-positive rate (Supplemental Fig. S5 a, b). Surprisingly, DESeq initial version performed better than DESeq2 after noise removal (see **Methods**), and DESeq2's performance decreased with increasing the threshold of fold change past a value of 1.5 (Supplemental Fig. S5 b). This trend may be attributed to the behavior that DESeq2 assesses lower p values ( $< 0.01$ ) to all the genes with greater fold change as we observed in this study.

### ***Verification with RT-qPCR***

In total, the expression level and differential expression profile of 18 genes were selected for verification of different DEG analysis methods with real time quantitative PCR (RT-qPCR; data provided by<sup>7</sup>). These genes were selected based on their biological significance in the mouse lens

development. For convenience, genes were grouped into three sections, according to their fold change levels, with positive and negative fold change indicating the gene up-regulation in fiber and epithelial cells respectively (Supplemental Fig.S6). Supplemental Figure S6a illustrated the odd behavior of CLC's Baggerley test, being the only test which did not agree with the qPCR results and other tests in the direction of fold change. This could result from the lack of normalization for sequencing depth across the samples. For instance, the DESeq size factor utility found that the biological replicates for epithelial cells were not homogenous in the sequencing depth. The size factors (as known as sequencing depth) obtained were 0.98, 2.15, 2.01, 0.68, 0.65 and 0.56 for E1, E2, E3, F1, F2 and F3, respectively, where E stands for epithelial cells and F stands for fiber cells. This non-homogeneity in the sequencing depth between samples needs to be normalized by the statistical tests for differential gene expression, and CLC's Baggerley test lacks this normalization. Among the five methods, DESeq2 and DESeq agree best (overlap of error rates) with qPCR expression in terms of fold change level, followed by CLC's EDGE and Cuffdiff2 (Supplemental Fig. S6 b, c).

## **2. Supplemental Methods**

### ***Identification of differentially expressed genes***

To identify differentially expressed genes (DEGs) between lens epithelial cells and lens fiber cells, five different statistical methods: DESeq<sup>2</sup> and DESeq2<sup>2</sup>, Cuffdiff2<sup>8</sup>, and two versions of CLC Genomics Workbench - Baggerley test in version 6.5.1 and Empirical Analysis of Differential Gene Expression (EDGE) in version 7 were utilized. The raw counts of mapped reads to the genes were used for all the statistical methods except Cuffdiff2 which requires a normalized measure of gene count RPKM (Reads Per Kilo base per Million reads) that was obtained using Cufflinks 2.1<sup>3</sup>. The HTSeq package<sup>2</sup> was used to construct a gene count table/matrix used for DESeq and DESeq2. For CLC, which forbids third party count matrices, the matrix produced within CLC was used. For all the methods, significant DEGs were identified with false discovery rate (FDR) corrected p-value. A Venn diagram of the common genes was drawn using the software package VennDiagram<sup>9</sup> developed in R (<http://cran.r-project.org/>).

### ***Evaluating the performance of statistical methods***

Statistical methods for discriminating DEG analyses work on rejecting the null hypothesis, that genes are not truly differentially expressed. In the process, the methods delineate the conditions of the genes with p-value, probability of obtaining a test statistic when the null hypothesis is

true. We evaluated the ability of each method analyzed in terms of the tradeoff between specificity and sensitivity. Calculation of specificity and sensitivity depends on the estimation of true-positive (TP), true-negative (TN), false-positive (FP) and false-negative (FN) genes, which in turn requires the identification of genes that are not actually differentially expressed (i.e., for which the null hypothesis is true) and that are actually differentially expressed (i.e., for which the null hypothesis is false). This was accomplished using formulas established by De Smet et al<sup>4</sup> and Storey et al<sup>5</sup>. De Smet and co-worker's approach involves finding  $N_0$ , the number of genes that are not actually differentially expressed, and  $N_1$ , the number of genes that are actually differentially expressed. Their definition of  $N_0$  is as follows,

$$N_0 = \lim_{\lambda \rightarrow 1} \frac{\text{number of genes with } p \text{ value} > \lambda}{1 - \lambda} \quad (\text{Eq. 3})$$

Here  $\lambda$  is the value after which the FDR adjusted p-values distribution becomes uniform. A uniform distribution of p-values is achieved for all the methods after removing the noise (peaks of high p-values). Once  $N_0$  is estimated,  $N_1$  can be derived by subtracting  $N_0$  from  $N$ , the total number of expressed genes, i.e.,  $N_1 = N - N_0$ . Next, let  $\epsilon$  be the number of genes declared differentially expressed at a rejection p value  $\alpha$ . Then

$$TP = \epsilon - \alpha N_0 \quad (\text{Eq. 4})$$

$$FP = \alpha N_0 \quad (\text{Eq. 5})$$

$$TN = (1 - \alpha) N_0 \quad (\text{Eq. 6})$$

$$FN = N_1 - \epsilon + \alpha N_0 \quad (\text{Eq. 7})$$

$$\text{Sensitivity} = TP / (TP + FN) \quad (\text{Eq. 8})$$

### ***Performance assessment using ROC curve***

Specificity and Sensitivity of the methods were calculated using Equation 1 and 8, where Equations 1 and 2 are described in the main content of this paper. The ability of each method to identify actual DEGs was evaluated using the receiver operating characteristic (ROC) curve<sup>10</sup>, a popular method to quantify method ability (For example see<sup>11</sup>). A ROC curve is obtained by plotting the true positive rate (sensitivity) versus the

false positive rate (1–specificity) at all possible rejection levels  $\alpha = p_i$  ( $i = 0, \dots, 1$ ). The area under the ROC for each method was calculated using the trapezoid equation<sup>12</sup> by a PERL script. The scripts (PERL and R) developed for all the statistical analysis are available here (<http://cadbure.sourceforge.net/>).

### **Validation of RNA-seq results with RT-qPCR**

The DEGs that disagree in fold change among five statistical packages (DESeq, DESeq2, Cuffdiff2, CLC's Baggerley test and EDGE) were selected based on their biological importance in the lens and verified with quantitative reverse transcription-polymerase chain reaction (RT-qPCR). The procedures for RT-qPCR are as described previously<sup>7</sup>. Briefly, cDNAs for the selected genes were synthesized using a reverse transcription kit (Invitrogen) according to the manufacturer's instructions. qPCR assay study was conducted; and the quantification cycle (Cq, also commonly called the Ct) was obtained and  $\Delta Cq$  value was calculated by  $Cq_{(gene)} - Cq_{(GAPDH)}$ . For fold-change expression,  $\Delta\Delta Cq$  was first calculated by subtracting the mean of  $\Delta Cq$  values of fiber samples from the mean  $\Delta Cq$  values of epithelial samples; and then converted to  $2^{(-\Delta\Delta Cq)}$ . The data were expressed as mean  $\pm$  standard error of the mean (SEM).

### **3. Supplemental References**

1. Robinson, M., McCarthy, D. & Smyth, G. EdgeR: a bioconductor package for differential expression analysis of digital gene expression data. *Bioinformatics* **26**, 139–140 (2010).
2. Anders, S. & Huber, W. Differential expression analysis for sequence count data. *Genome Biol* **11**, R106 (2010).
3. Trapnell, C. *et al.* Differential gene and transcript expression analysis of RNA-seq experiments with TopHat and Cufflinks. *Nat. Protoc.* **7**, 562–578 (2012).
4. De Smet, F. *et al.* Balancing false positives and false negatives for the detection of differential expression in malignancies. *Br. J. Cancer* **91**, 1160–1165 (2004).
5. Storey, J. D. & Tibshirani, R. Statistical significance for genomewide studies. *Proc. Natl. Acad. Sci.* **100**, 9440–9445 (2003).
6. Dawson, B. & Trapp, R. G. *Basic & Clinical Biostatistics*. (Appleton & Lange, 1994).

7. Hoang, T., Raj Kumar, P. K., Sutharzan, S., Tsonis, P. & Liang, C. Comparative transcriptome analysis of epithelial and fiber cells in newborn mouse lenses by RNA sequencing. *Mol. Vis.* **20**, 1491-1517 (2014).
8. Trapnell, C. *et al.* Differential analysis of gene regulation at transcript resolution with RNA-seq. *Nat. Biotechnol.* **31**, 46–53 (2013).
9. Chen, H. & Boutros, P. C. VennDiagram: a package for the generation of highly-customizable Venn and Euler diagrams in R. *BMC Bioinformatics* **12**, 35 (2011).
10. Hanley, J. A. & McNeil, B. J. The meaning and use of the area under a receiver operating characteristic (ROC) curve. *Radiology* **143**, 29–36 (1982).
11. Rapaport, F. *et al.* Comprehensive evaluation of differential gene expression analysis methods for RNA-seq data. *Genome Biol.* **14**, R95 (2013).
12. Fawcett, T. An introduction to ROC analysis. *Pattern Recognit. Lett.* **27**, 861–874 (2006).
13. Milne, I. *et al.* Using Tablet for visual exploration of second-generation sequencing data. *Brief. Bioinform.* **14**, 193–202 (2013).

#### 4. Supplemental Tables

**Supplemental Table S1. Counts of raw and trimmed reads.**

| Sample ID                   | Sequencing type | Raw Reads  | Trimmed Reads | Avg. Length after Trim |
|-----------------------------|-----------------|------------|---------------|------------------------|
| Epithelial Replicate 1 (E1) | RNA-seq         | 33,174,286 | 30,524,674    | 47                     |
| Epithelial Replicate 2 (E2) | RNA-seq         | 29,919,226 | 27,392,629    | 46.9                   |
| Epithelial Replicate 3 (E3) | RNA-seq         | 29,965,660 | 28,203,944    | 46.9                   |
| Fiber Replicate 1 (F1)      | RNA-seq         | 28,652,759 | 27,019,907    | 46.8                   |
| Fiber Replicate 2 (F2)      | RNA-seq         | 30,661,663 | 27,760,247    | 46.9                   |
| Fiber Replicate 3 (F3)      | RNA-seq         | 24,833,352 | 22,735,990    | 46.8                   |

Reads are trimmed based on the low quality, adapters, primers, poly (A)/ (T) and ambiguous poly (N) tails. Read length before trimming was 51 nt uniformly.

**Supplemental Table S2. Percentage of trimmed reads mapped to reference by parameter set.**

| <b>Protocols</b>         | <b>E1</b> | <b>E2</b> | <b>E3</b> | <b>F1</b> | <b>F2</b> | <b>F3</b> |
|--------------------------|-----------|-----------|-----------|-----------|-----------|-----------|
| GSNAP-SNP-tol 2 mismatch | 96.36%    | 99.61%    | 96.79%    | 95.54%    | 99.04%    | 99.54%    |
| GSNAP 2 mismatch         | 95.53%    | 99.49%    | 96.60%    | 95.47%    | 98.83%    | 99.41%    |
| TopHat2 2mM              | 79.90%    | 95.72%    | 92.54%    | 92.25%    | 92.73%    | 95.51%    |
| GSNAP-SNP-tol 1 mismatch | 77.58%    | 94.06%    | 90.94%    | 90.83%    | 91.21%    | 94.02%    |
| TopHat2 1 mismatch       | 75.64%    | 93.56%    | 90.40%    | 90.28%    | 90.25%    | 93.35%    |
| GSNAP 1 mismatch         | 74.87%    | 93.12%    | 89.95%    | 90.08%    | 89.98%    | 93.12%    |
| CLC 2 mismatch           | 69.04%    | 90.17%    | 86.92%    | 87.76%    | 87.11%    | 90.70%    |
| CLC 1 mismatch           | 65.55%    | 88.21%    | 84.98%    | 85.85%    | 84.79%    | 88.63%    |
| GSNAP-SNP-tol 0 mismatch | 66.51%    | 82.94%    | 80.05%    | 80.27%    | 80.27%    | 83.05%    |
| GSNAP 0 mismatch         | 60.55%    | 80.00%    | 77.11%    | 77.27%    | 76.50%    | 79.71%    |
| TopHat2 0 mismatch       | 59.15%    | 79.47%    | 76.36%    | 76.79%    | 75.74%    | 79.07%    |
| CLC 0 mismatch           | 53.07%    | 75.38%    | 72.41%    | 73.18%    | 71.63%    | 75.34%    |

Table is sorted by the values in E1. GSNAP-SNP-tol: GSNAP with SNP tolerance.

**Supplemental Table S3. Absolute counts for Scenarios 1 to 8 in the pairwise comparison of alignment results between GSNAP with SNP tolerance and TopHat2 identified by CADBURE.**

| Scenario        | E1                       |            | E2                       |            | E3                       |            | F1                       |            | F2                       |            | F3                       |            |
|-----------------|--------------------------|------------|--------------------------|------------|--------------------------|------------|--------------------------|------------|--------------------------|------------|--------------------------|------------|
|                 | GSNAP with SNP tolerance | TopHat2    |
| 1.              | 12,656,645               | 12,656,645 | 20,453,448               | 20,453,448 | 19,909,201               | 19,909,201 | 19,696,509               | 19,696,509 | 19,167,240               | 19,167,240 | 16,987,204               | 16,987,204 |
| 2.              | 1,016                    | 46,266     | 2,503                    | 113,815    | 2,372                    | 102,035    | 1,816                    | 89,125     | 1,733                    | 85,114     | 1,657                    | 76,316     |
| 3.              | 476,054                  | 430,804    | 454,463                  | 343,151    | 426,590                  | 326,927    | 469,901                  | 382,592    | 439,388                  | 356,007    | 355,064                  | 280,405    |
| 4.              | 244,611                  | 244,611    | 84,196                   | 84,196     | 105,689                  | 105,689    | 54,135                   | 54,135     | 86,655                   | 86,655     | 51,928                   | 51,928     |
| 5.              | 149,834                  | 5,847,677  | 93,329                   | 2,900,719  | 90,586                   | 3,221,787  | 468,732                  | 1,470,479  | 383,647                  | 2,349,866  | 296,568                  | 1,446,903  |
| 6.              | 4,577,108                | 2,916      | 911,936                  | 1,594      | 1,054,947                | 1,884      | 784,515                  | 1,401      | 1,578,877                | 1,645      | 814,537                  | 1,272      |
| 7.              | 5,010,825                | 5,010,825  | 2,228,921                | 2,228,921  | 2,340,707                | 2,340,707  | 2,762,823                | 2,762,823  | 3,311,726                | 3,311,726  | 2,573,666                | 2,573,666  |
| 8.              | 450,197                  | 825        | 156,408                  | 355        | 147,824                  | 465        | 105,848                  | 221        | 175,913                  | 303        | 103,243                  | 223        |
| True Positives  | 17,709,807               | 13,090,365 | 21,819,847               | 20,798,193 | 21,390,738               | 20,238,012 | 20,950,925               | 20,080,502 | 21,185,505               | 19,524,892 | 18,156,805               | 17,268,881 |
| False Positives | 395,461                  | 6,138,554  | 180,028                  | 3,098,730  | 198,647                  | 3,429,511  | 524,683                  | 1,613,739  | 472,035                  | 2,521,635  | 350,153                  | 1,575,147  |
| True Negatives  | 11,308,699               | 5,161,484  | 5,286,048                | 2,322,605  | 5,710,318                | 2,431,758  | 4,339,150                | 3,231,776  | 5,837,505                | 3,695,676  | 4,123,812                | 2,870,457  |
| Specificity     | 0.9662                   | 0.4568     | 0.9671                   | 0.4284     | 0.9664                   | 0.4149     | 0.8921                   | 0.667      | 0.9252                   | 0.5944     | 0.9217                   | 0.6457     |
| Accuracy        | 0.9866                   | 0.7483     | 0.9934                   | 0.8818     | 0.9927                   | 0.8686     | 0.9797                   | 0.9353     | 0.9828                   | 0.902      | 0.9845                   | 0.9275     |

**Supplemental Table S4. Specificity and Accuracy differences in the pairwise comparison of alignment results between GSNAP with SNP tolerance and TopHat2 identified by CADBURE.**

| Sample | Specificity difference between GSNAP with SNP tolerance and TopHat2 using Bootstrap |                 | Accuracy difference between GSNAP with SNP tolerance and TopHat2 using Bootstrap |                 |
|--------|-------------------------------------------------------------------------------------|-----------------|----------------------------------------------------------------------------------|-----------------|
|        | Mean(SE)                                                                            | 95% CI          | Mean (SE)                                                                        | 95% CI          |
| E1     | 0.5094(0.0002)                                                                      | (0.0129,0.4967) | 0.2382(0.0001)                                                                   | (0.0060,0.2323) |
| E2     | 0.5386(0.0002)                                                                      | (0.0137,0.5252) | 0.1116(0.0001)                                                                   | (0.0028,0.1088) |
| E3     | 0.5515(0.0002)                                                                      | (0.0140,0.5377) | 0.1241(0.0001)                                                                   | (0.0032,0.1210) |
| F1     | 0.2252(0.0003)                                                                      | (0.0059,0.2196) | 0.0444(0.0001)                                                                   | (0.0012,0.0433) |
| F2     | 0.3308(0.0002)                                                                      | (0.0085,0.3225) | 0.0808(0.0001)                                                                   | (0.0021,0.0788) |
| F3     | 0.2761(0.0003)                                                                      | (0.0071,0.2692) | 0.0571(0.0001)                                                                   | (0.0015,0.0556) |

**Supplemental Table S5. Absolute counts for Scenarios 1 to 8 in the pairwise comparison of alignment results between GSNAP without SNP tolerance and TopHat2 identified by CADBURE.**

| Scenario        | E1         |            | E2         |            | E3         |            | F1         |            | F2         |            | F3         |            |
|-----------------|------------|------------|------------|------------|------------|------------|------------|------------|------------|------------|------------|------------|
|                 | GSNAP      | TopHat2    |
| 1.              | 14,971,258 | 14,971,258 | 21,008,010 | 21,008,010 | 20,565,863 | 20,565,863 | 20,017,045 | 20,017,045 | 19,818,170 | 19,818,170 | 17,310,903 | 17,310,903 |
| 2.              | 1,117      | 47,579     | 2,826      | 116,173    | 2,649      | 104,546    | 1,940      | 90,187     | 1,849      | 85,968     | 1,747      | 77,275     |
| 3.              | 629,095    | 582,633    | 580,272    | 466,925    | 555,077    | 453,180    | 537,226    | 448,979    | 574,692    | 490,573    | 449,621    | 374,093    |
| 4.              | 775,756    | 775,756    | 134,328    | 134,328    | 217,101    | 217,101    | 77,843     | 77,843     | 233,189    | 233,189    | 105,862    | 105,862    |
| 5.              | 69,808     | 2,844,938  | 69,717     | 2,168,078  | 65,294     | 2,323,144  | 242,396    | 1,057,464  | 170,207    | 1,415,119  | 89,216     | 973,327    |
| 6.              | 4,317,766  | 6,755      | 879,574    | 3,409      | 997,607    | 3,689      | 739,439    | 2,723      | 1,494,374  | 3,508      | 771,349    | 2,568      |
| 7.              | 5,090,220  | 5,090,220  | 2,252,248  | 2,252,248  | 2,365,688  | 2,365,688  | 2,988,983  | 2,988,983  | 3,524,903  | 3,524,903  | 2,780,830  | 2,780,830  |
| 8.              | 460,912    | 1,456      | 156,559    | 640        | 151,858    | 776        | 132,324    | 397        | 201,304    | 566        | 118,659    | 411        |
| True Positives  | 19,918,119 | 15,560,646 | 22,467,856 | 21,478,344 | 22,118,547 | 21,022,732 | 21,293,710 | 20,468,747 | 21,887,236 | 20,312,251 | 18,531,873 | 17,687,564 |
| False Positives | 846,681    | 3,668,273  | 206,871    | 2,418,579  | 285,044    | 2,644,791  | 322,179    | 1,225,494  | 405,245    | 1,734,276  | 196,825    | 1,156,464  |
| True Negatives  | 8,396,070  | 5,161,484  | 4,576,885  | 2,322,605  | 4,840,690  | 2,431,758  | 4,178,771  | 3,231,776  | 5,141,326  | 3,695,676  | 3,872,816  | 2,870,457  |
| Specificity     | 0.9084     | 0.5846     | 0.9568     | 0.4899     | 0.9444     | 0.479      | 0.9284     | 0.7251     | 0.9269     | 0.6806     | 0.9516     | 0.7128     |
| Accuracy        | 0.971      | 0.8496     | 0.9924     | 0.9078     | 0.9895     | 0.8987     | 0.9875     | 0.9508     | 0.9852     | 0.9326     | 0.9913     | 0.9467     |

**Supplemental Table S6. Specificity and Accuracy differences in the pairwise comparison of alignment results between GSNAP without SNP tolerance and TopHat2 identified by CADBURE.**

| Sample | Specificity difference between GSNAP and TopHat2 using Bootstrap |                 | Accuracy difference between GSNAP and TopHat2 using Bootstrap |                 |
|--------|------------------------------------------------------------------|-----------------|---------------------------------------------------------------|-----------------|
|        | Mean(SE)                                                         | 95% CI          | Mean (SE)                                                     | 95% CI          |
| E1     | 0.3238(0.0002)                                                   | (0.0083,0.3158) | 0.1214(0.0001)                                                | (0.0031,0.1183) |
| E2     | 0.4669(0.0002)                                                   | (0.0119,0.4552) | 0.0847(0.0001)                                                | (0.0022,0.0825) |
| E3     | 0.4654(0.0002)                                                   | (0.0119,0.4537) | 0.0909(0.0001)                                                | (0.0023,0.0886) |
| F1     | 0.2034(0.0002)                                                   | (0.0053,0.1983) | 0.0367(0.0001)                                                | (0.0010,0.0358) |
| F2     | 0.2463(0.0002)                                                   | (0.0064,0.2402) | 0.0526(0.0001)                                                | (0.0014,0.0513) |
| F3     | 0.2388(0.0003)                                                   | (0.0062,0.2329) | 0.0445(0.0001)                                                | (0.0012,0.0434) |

**Supplemental Table S7. Absolute counts for Scenarios 1 to 8 in the pairwise comparison of alignment results between GSNAP without SNP tolerance and GSNAP with SNP tolerance identified by CADBURE.**

| Scenario        | E1         |                          | E2         |                          | E3         |                          | F1         |                          | F2         |                          | F3         |                          |
|-----------------|------------|--------------------------|------------|--------------------------|------------|--------------------------|------------|--------------------------|------------|--------------------------|------------|--------------------------|
|                 | GSNAP      | GSNAP with SNP tolerance |
| 1.              | 15,429,348 | 15,429,348               | 21,526,125 | 21,526,125               | 20,995,509 | 20,995,509               | 20,926,919 | 20,926,919               | 20,644,600 | 20,644,600               | 17,932,867 | 17,932,867               |
| 2.              | 170        | 26,334                   | 380        | 1,923                    | 343        | 2,694                    | 162        | 759                      | 136        | 6,028                    | 114        | 1,752                    |
| 3.              | 1,355,343  | 1,329,179                | 217,952    | 216,409                  | 264,522    | 262,171                  | 146,698    | 146,101                  | 410,804    | 404,912                  | 173,825    | 172,187                  |
| 4.              | 683,815    | 683,815                  | 111,937    | 111,937                  | 154,450    | 154,450                  | 72,254     | 72,254                   | 198,949    | 198,949                  | 91,209     | 91,209                   |
| 5.              | 3,283,606  | 397,422                  | 817,561    | 111,685                  | 987,450    | 122,676                  | 469,307    | 310,428                  | 1,033,825  | 343,381                  | 529,549    | 280,907                  |
| 6.              | 12,518     | 239,170                  | 772        | 31,796                   | 1,317      | 51,885                   | 549        | 19,147                   | 4,167      | 59,670                   | 1,134      | 28,036                   |
| 7.              | 7,998,647  | 7,998,647                | 4,465,189  | 4,465,189                | 4,718,005  | 4,718,005                | 3,868,343  | 3,868,343                | 4,797,944  | 4,797,944                | 3,591,908  | 3,591,908                |
| 8.              | 1          | 26,446                   | 11         | 3,298                    | 9          | 4,863                    | 0          | 1,500                    | 1          | 5,736                    | 1          | 2,355                    |
| True Positives  | 16,797,209 | 16,997,697               | 21,744,849 | 21,774,330               | 21,261,348 | 21,309,565               | 21,074,166 | 21,092,167               | 21,059,571 | 21,109,182               | 18,107,826 | 18,133,090               |
| False Positives | 3,967,591  | 1,107,571                | 929,878    | 225,545                  | 1,142,243  | 279,820                  | 541,723    | 383,441                  | 1,232,910  | 548,358                  | 620,872    | 373,868                  |
| True Negatives  | 8,396,070  | 11,308,699               | 4,576,885  | 5,286,048                | 4,840,690  | 5,710,318                | 4,178,771  | 4,339,150                | 5,141,326  | 5,837,505                | 3,872,816  | 4,123,812                |
| Specificity     | 0.6791     | 0.9108                   | 0.8311     | 0.9591                   | 0.8091     | 0.9533                   | 0.8852     | 0.9188                   | 0.8066     | 0.9141                   | 0.8618     | 0.9169                   |
| Accuracy        | 0.8639     | 0.9623                   | 0.9659     | 0.9917                   | 0.9581     | 0.9898                   | 0.979      | 0.9851                   | 0.9551     | 0.9801                   | 0.9725     | 0.9835                   |

**Supplemental Table S8. Specificity and Accuracy differences in the pairwise comparison of alignment results between GSNAP without SNP tolerance and GSNAP with SNP tolerance identified by CADBURE.**

| Sample | Specificity difference between GSNAP with SNP tolerance and GSNAP without SNP tolerance using Bootstrap |                 | Accuracy difference between GSNAP with SNP tolerance and GSNAP without SNP tolerance using Bootstrap |                 |
|--------|---------------------------------------------------------------------------------------------------------|-----------------|------------------------------------------------------------------------------------------------------|-----------------|
|        | Mean(SE)                                                                                                | 95% CI          | Mean (SE)                                                                                            | 95% CI          |
| E1     | 0.2317(0.0002)                                                                                          | (0.0059,0.2259) | 0.0984(0.0001)                                                                                       | (0.0025,0.0959) |
| E2     | 0.1279(0.0002)                                                                                          | (0.0034,0.1247) | 0.0259(0.0000)                                                                                       | (0.0007,0.0252) |
| E3     | 0.1442(0.0002)                                                                                          | (0.0038,0.1406) | 0.0317(0.0000)                                                                                       | (0.0008,0.0309) |
| F1     | 0.0336(0.0002)                                                                                          | (0.0010,0.0327) | 0.0061(0.0000)                                                                                       | (0.0002,0.0060) |
| F2     | 0.1076(0.0002)                                                                                          | (0.0029,0.1049) | 0.0250(0.0000)                                                                                       | (0.0007,0.0244) |
| F3     | 0.0550(0.0002)                                                                                          | (0.0016,0.0537) | 0.0110(0.0000)                                                                                       | (0.0003,0.0107) |

**Supplemental Table S9. Number of differentially expressed genes (DEGs) shared between methods.**

| Methods for detecting DEG                            | Predicted Numbers of DEG |
|------------------------------------------------------|--------------------------|
| DESeq2 and CLC EDGE                                  | 4332                     |
| DESeq2 and Cuffdiff2                                 | 2989                     |
| CLC EDGE and CLC Baggerley                           | 2959                     |
| DESeq2 and CLC Baggerley                             | 2945                     |
| CLC EDGE and Cuffdiff2                               | 2837                     |
| DESeq2, CLC EDGE and Cuffdiff2                       | 2754                     |
| DESeq2, CLC EDGE and CLC Baggerley                   | 2704                     |
| DESeq2 and DESeq                                     | 1831                     |
| CLC Baggerley and Cuffdiff2                          | 1641                     |
| DESeq and Cuffdiff2                                  | 1633                     |
| DESeq and CLC EDGE                                   | 1627                     |
| DESeq2, DESeq and Cuffdiff2                          | 1620                     |
| DESeq2, DESeq and CLC EDGE                           | 1619                     |
| DESeq2, CLC Baggerley and Cuffdiff2                  | 1598                     |
| CLC EDGE, CLC Baggerley and Cuffdiff2                | 1583                     |
| DESeq2, CLC EDGE, CLC Baggerley and Cuffdiff2        | 1576                     |
| DESeq, CLC EDGE and Cuffdiff2                        | 1467                     |
| DESeq2, DESeq, CLC EDGE and Cuffdiff2                | 1464                     |
| DESeq and CLC Baggerley                              | 505                      |
| DESeq2, DESeq and CLC Baggerley                      | 505                      |
| DESeq, CLC EDGE and CLC Baggerley                    | 504                      |
| DESeq2, DESeq, CLC EDGE and CLC Baggerley            | 504                      |
| DESeq, CLC Baggerley and Cuffdiff2                   | 413                      |
| DESeq2, DESeq, CLC Baggerley and Cuffdiff2           | 413                      |
| DESeq, CLC EDGE, CLC Baggerley and Cuffdiff2         | 412                      |
| DESeq2, DESeq, CLC EDGE, CLC Baggerley and Cuffdiff2 | 412                      |

Table is sorted by the numbers of shared genes.

**Supplemental Table S10.** The difference of a DEG determined using TopHat2 alignment versus SNP-tolerant GSNAP alignment.

|                          | id    | baseMean   | baseMean_E  | baseMean_F | foldChange | log2FoldChange | Pval     | padj     |
|--------------------------|-------|------------|-------------|------------|------------|----------------|----------|----------|
| TOPHAT                   | Rpl12 | 3874.69299 | 3231.135684 | 4518.25    | 1.398347   | 0.483723       | 0.002078 | 0.008811 |
| GSNAP with SNP tolerance | Rpl12 | 273.232588 | 337.0806039 | 209.3846   | 0.621171   | -0.68694       | 0.009925 | 0.037304 |

**Supplemental Table S11.** An excel file containing the reads reported as uniquely mapped to gene Rpl12 by TopHat2 result.

**Supplemental Table S12.** An excel file containing the same reads as in S11 with the mapping records as reported in GSNAP with SNP tolerance.

5. Supplemental Figures

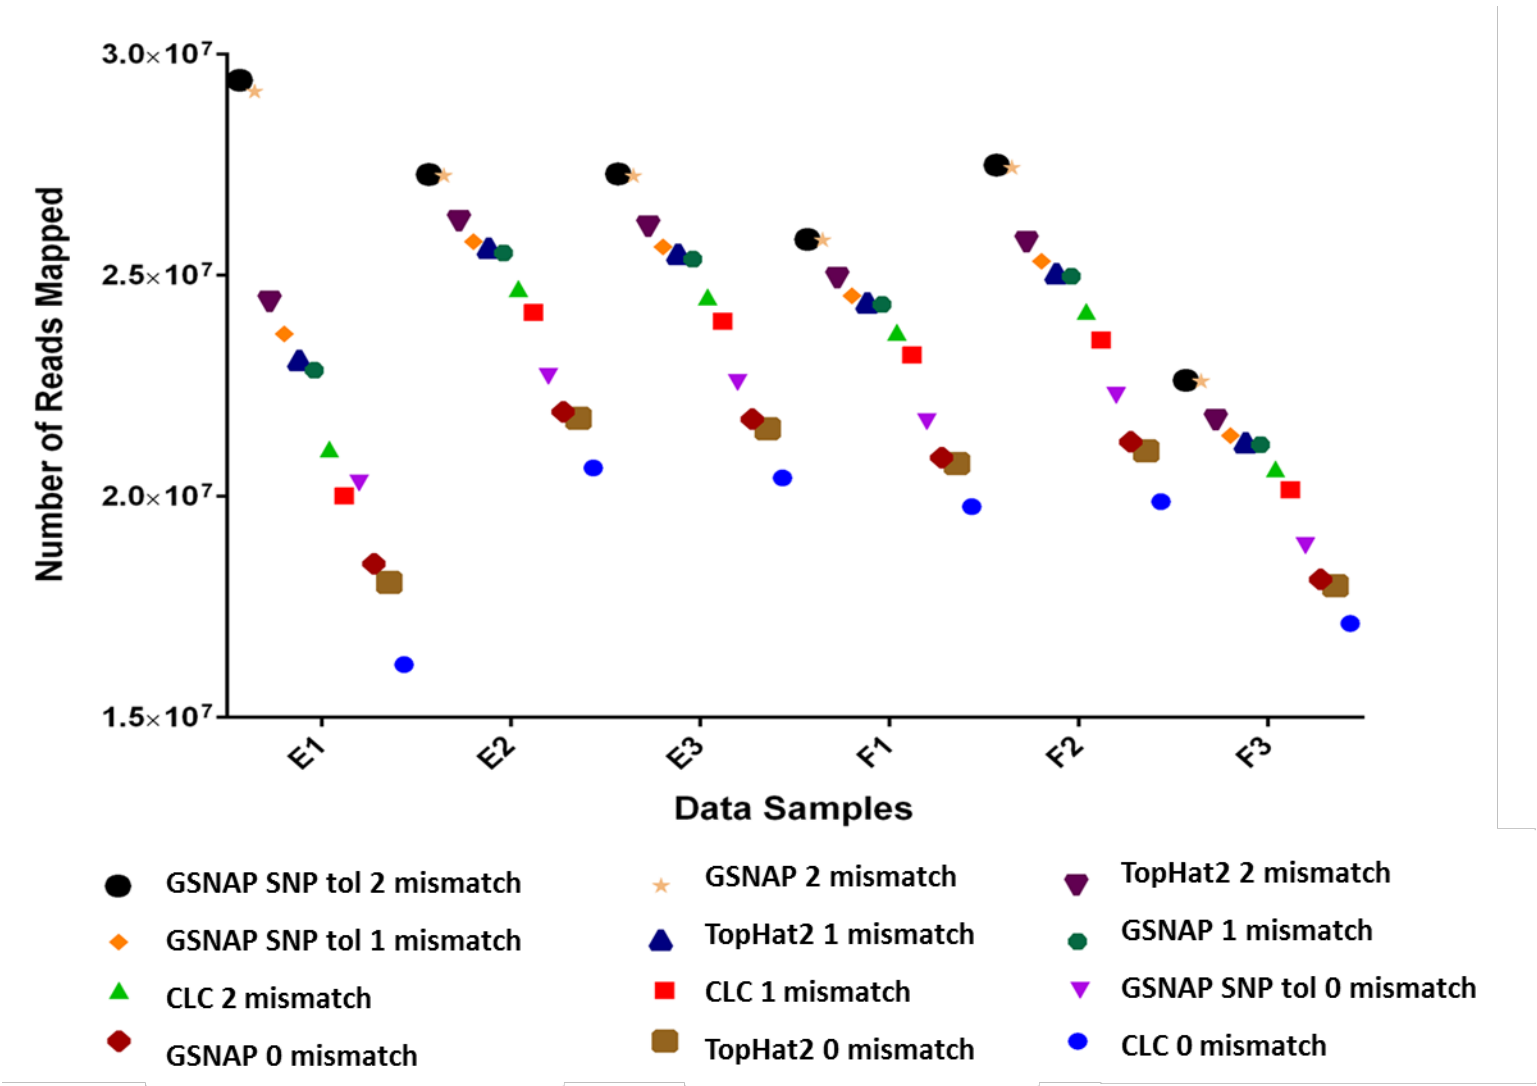

**Supplemental Figure S1. Total mapped reads of all the 6 data samples by using twelve different mapping parameter-sets with three different aligners: GSNAP, TopHat2 & CLC Genomics Workbench.**

The parameters varied are mismatch levels (i.e., 0, 1, 2 mismatches). E1, E2, E3 and F1, F2 and F3 are the three biological replicates of epithelial and fiber cells. The suffix mM next to a number indicates the allowed mismatch level in the mapping. The letters SNP-tol denotes SNP-tolerant alignment.

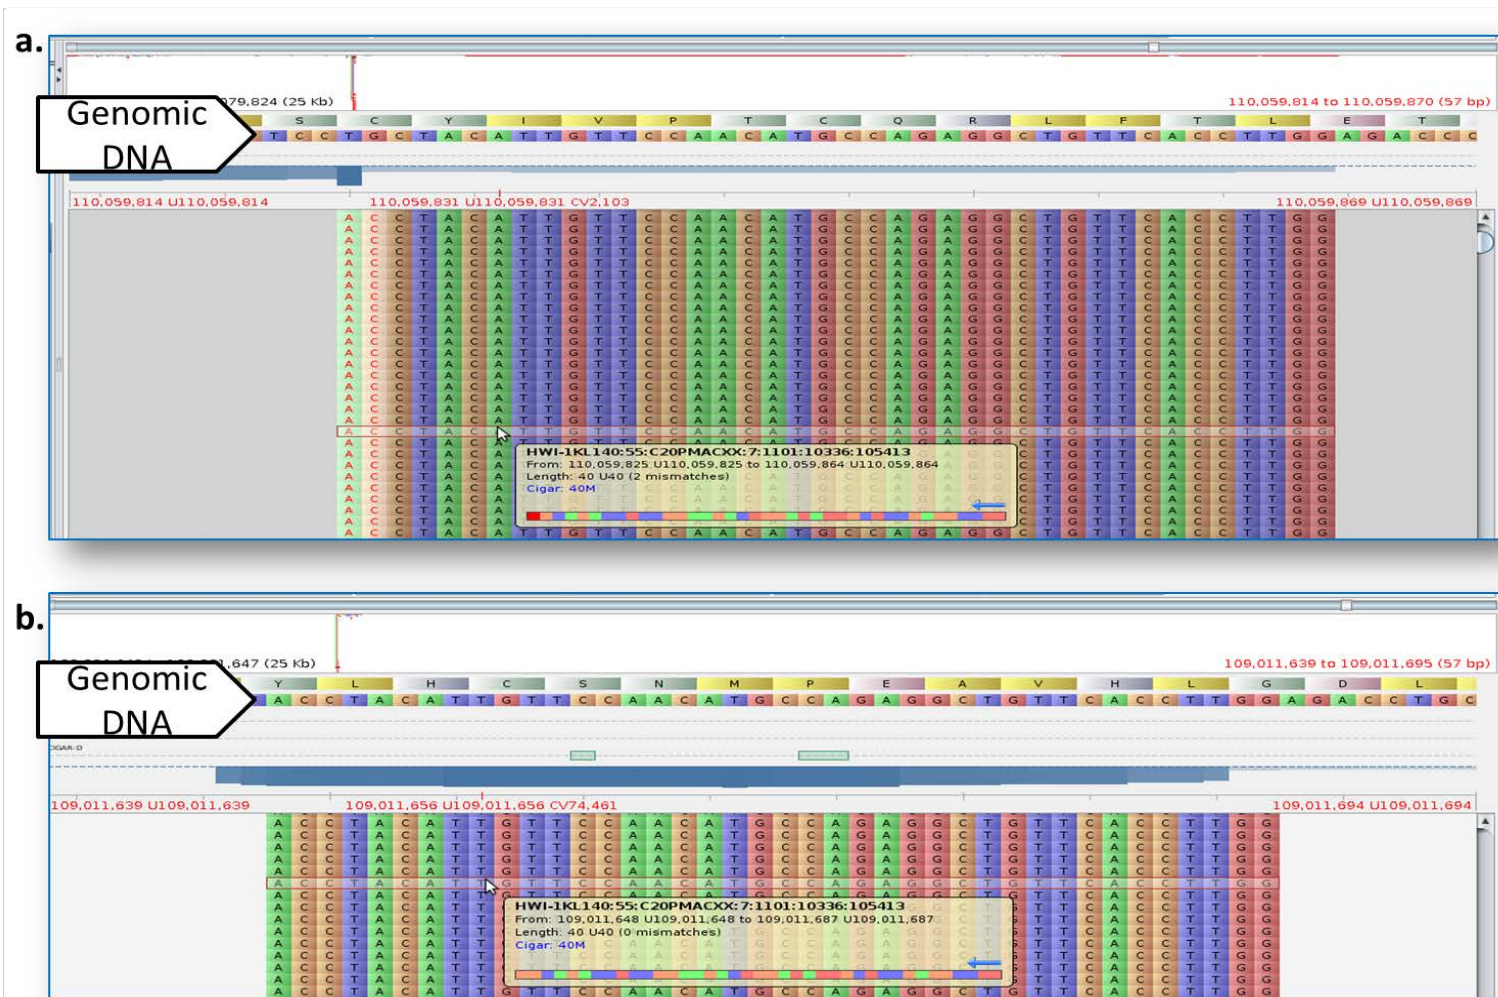

**Supplemental Figure S2: An example of Scenario 4.**

Read mapping (highlighted with red line) is identified as Scenario 4 by CADBURE and visualized in Tablet<sup>13</sup>. Tablet shows reads mapped against the mouse reference genome. The same read (name shown in popup) was reported as mapped uniquely to different genome locations by both GSNAP and TopHat2 aligners. (a). GSNAP mapped the highlighted 40 base read perfectly with no mismatches to Chromosome 11 from 109,011,648 to 109,011,687, whereas (b) TopHat2 mapped the same read with allowed two mismatches to Chromosome 7 from 110,059,825 to 110,059,864.

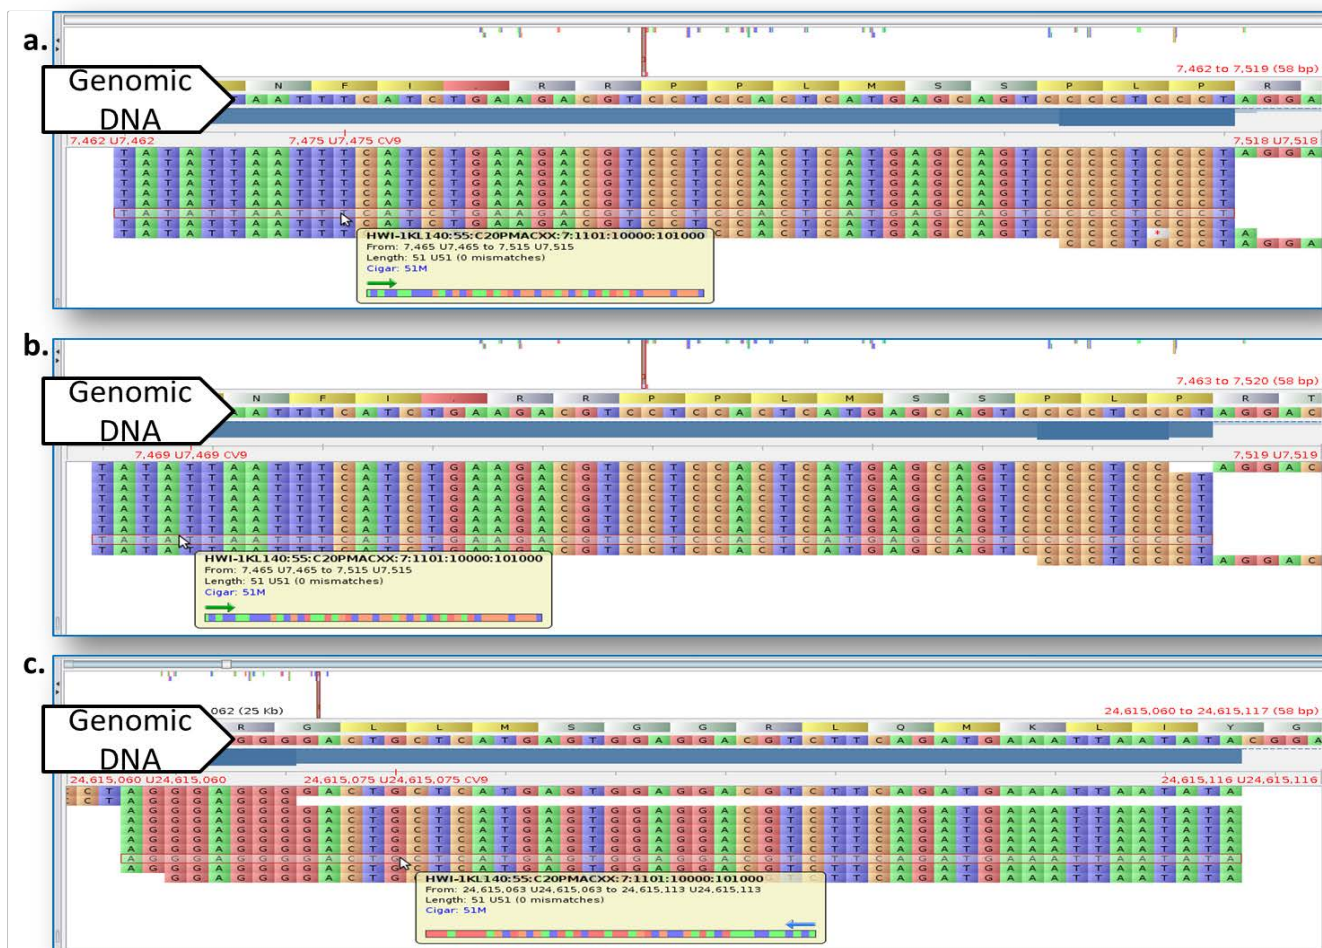

**Supplemental Figure S3: An example of the Scenario 5.**

Read mapping (highlighted with red line) is identified as Scenario 5 by CADBURE and visualized in Tablet<sup>13</sup>. Tablet shows reads mapped against the mouse reference genome. The same read (name shown in popup) was reported as mapped uniquely by TopHat2 and reported as mapped non-uniquely by GSNAP. (a). TopHat2 mapped the highlighted 51 base read with no mismatches to mitochondria from 7,465 to 7,515 and reported as unique mapping, whereas (b) GSNAP, in addition to mapping to mitochondria, also mapped the same read with reverse orientation and with no mismatches to Chromosome 1 from 24,615,063 to 24,615,663 (c).

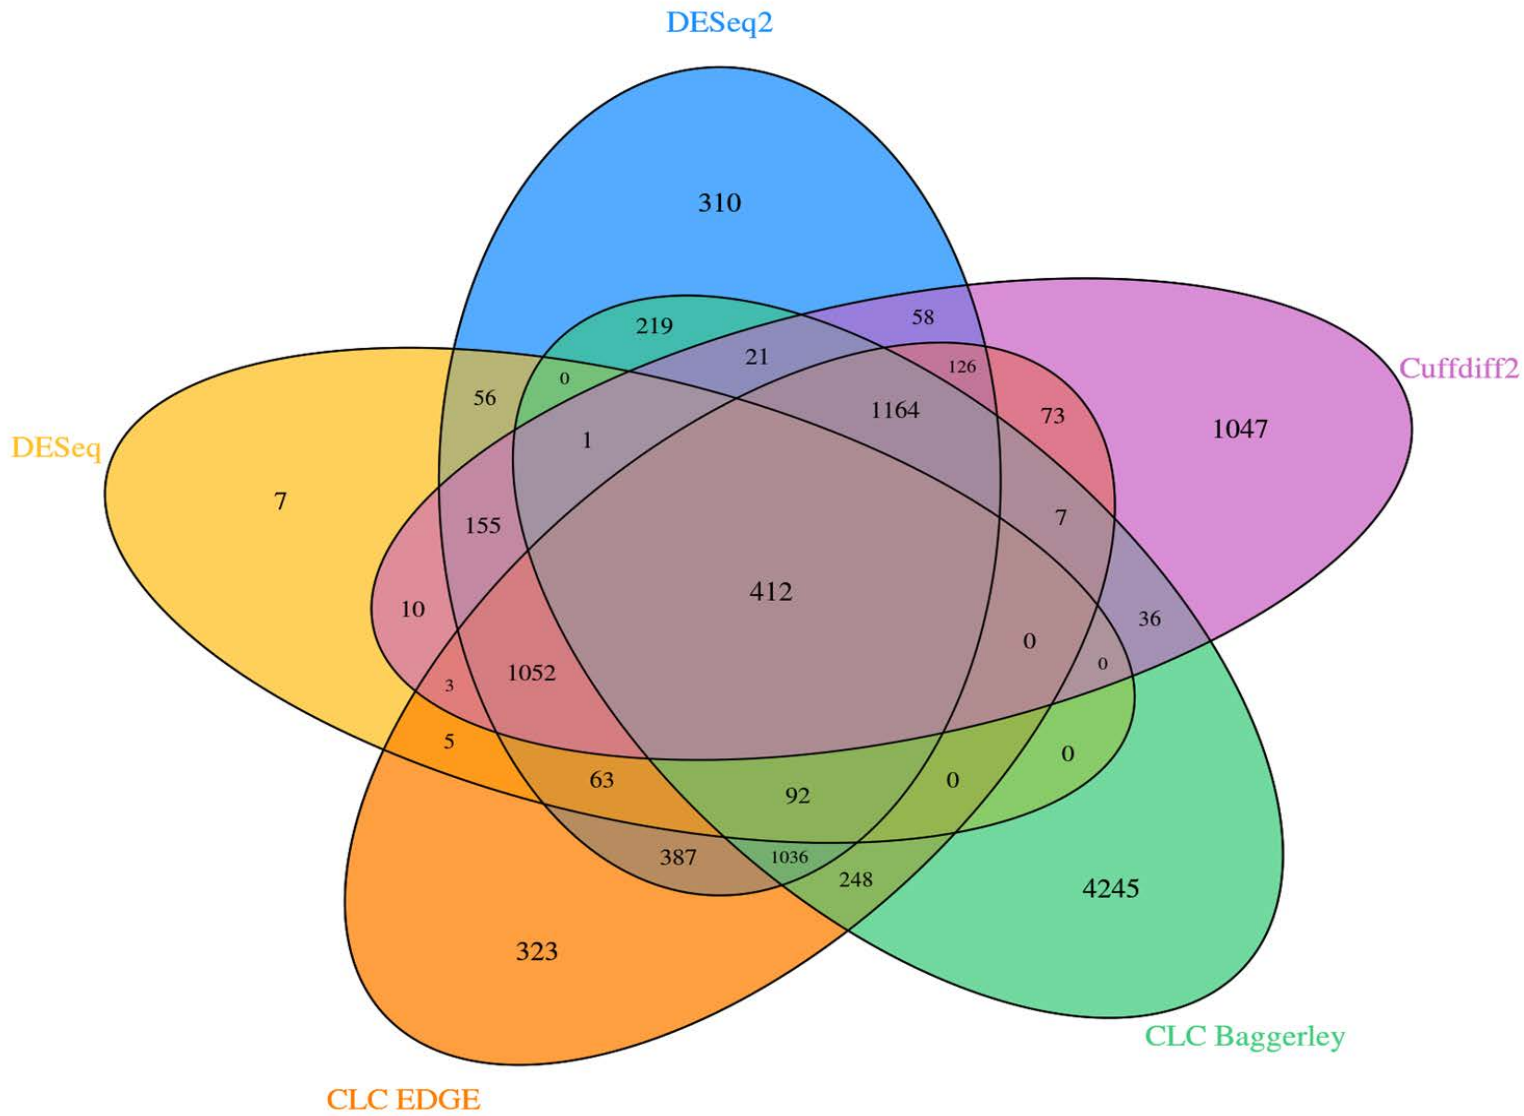

**Supplemental Figure S4: A Venn diagram of the comparison of Differentially Expressed Genes (DEGs) identified by five different statistical methods: Cuffdiff2, DESeq, DESeq2, CLC Baggerley test and CLC EDGE.**

The numbers represent the number of significant DEGs ( $p < 0.01$  and fold change  $\geq 2$ ).

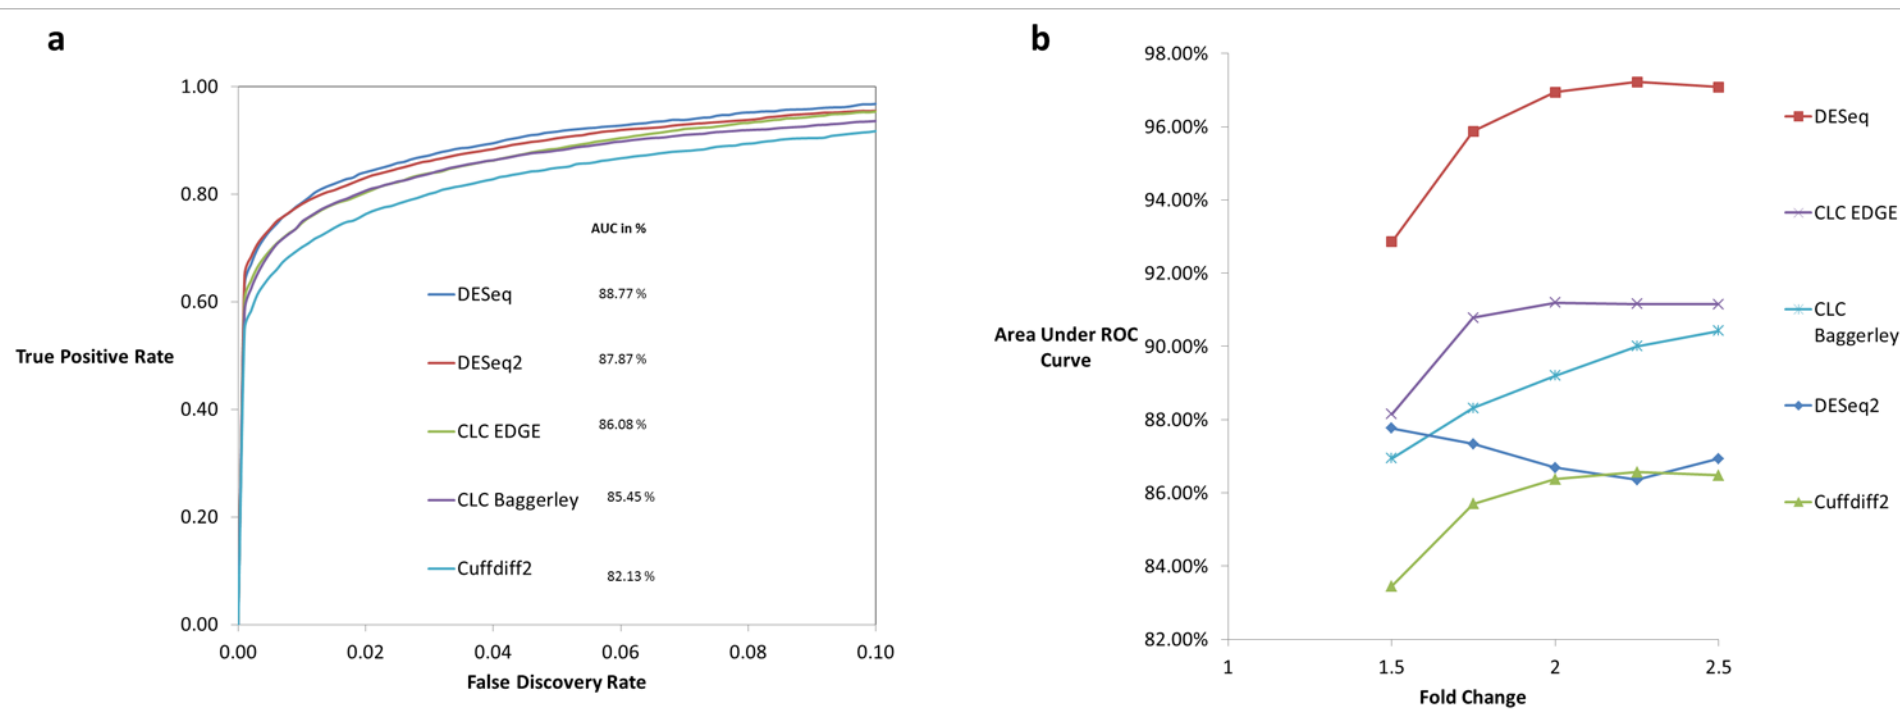

**Supplemental Figure S5: Receiver operating characteristic (ROC) curve for the differentially expressed genes identified by five different statistical methods: Cuffdiff2, DESeq, DESeq2, CLC Baggerley test and CLC EDGE.**

(a) ROC curve with all fold changes included. Fold-change was calculated based on the gene expression in the fiber cells relative to the epithelial cells. Negative values indicate expression lower in the fiber cells. Area under the curve (AUC) has shown for all the methods. (b) AUC for the five methods at five different fold changes 1.5, 1.75, 2, 2.25 and 2.5 of the differentially expressed genes.

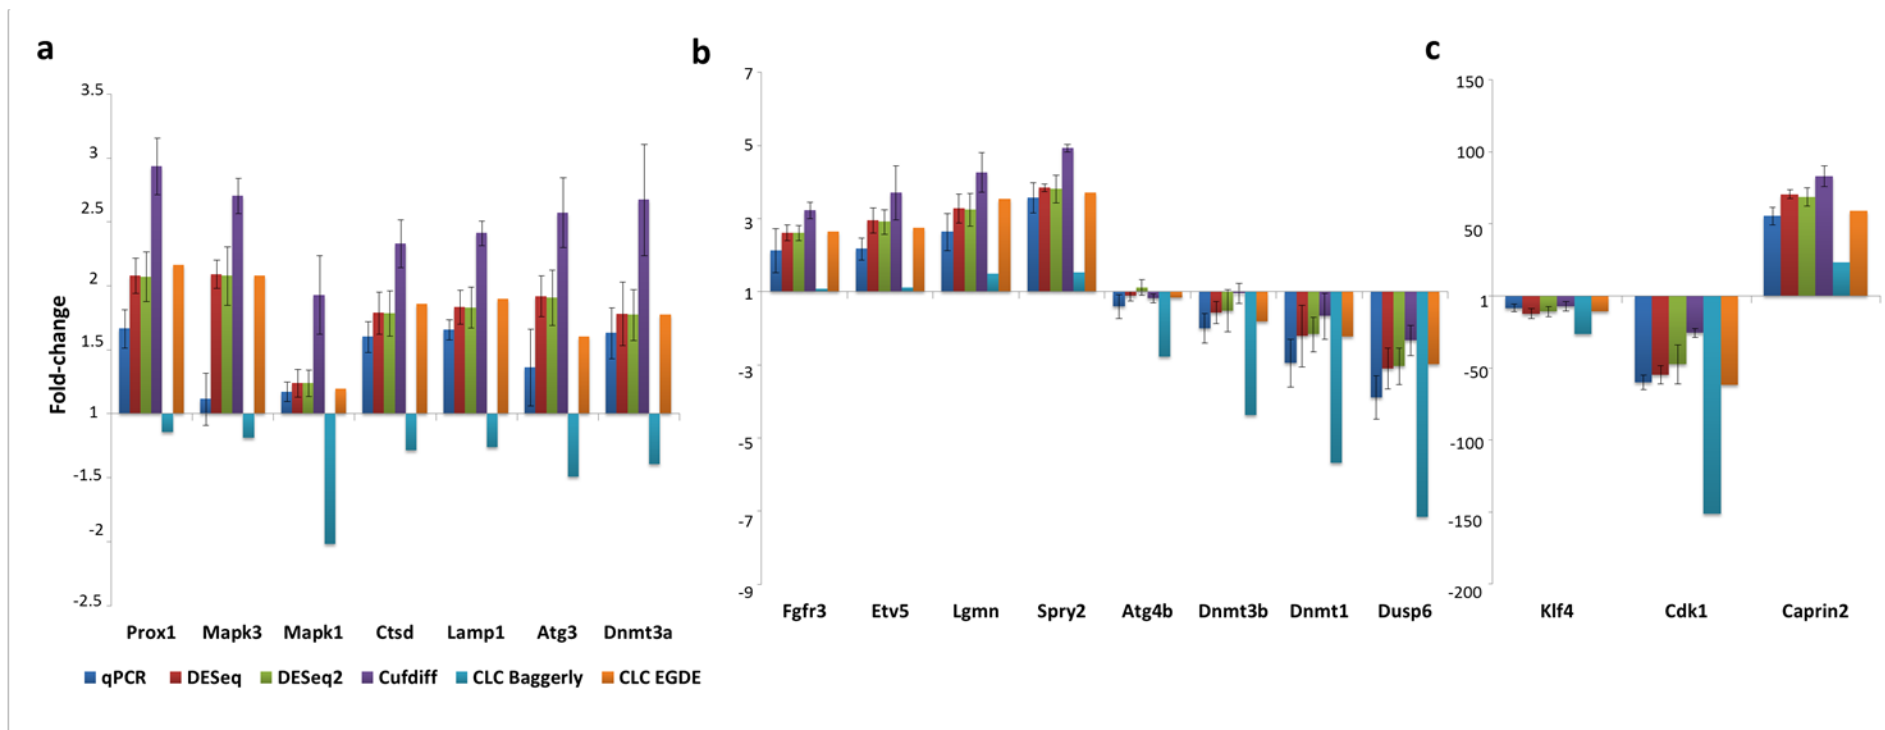

**Supplemental Figure S6: Quantitative measurement of differentially expressed genes (DEGs) was determined by qRT-PCR for total 18 genes with a wide range of the expression levels as compared with DEGs identified by five different statistical methods: Cuffdiff2, DESeq, DESeq2, CLC Baggerly test and CLC EDGE.**

The comparison for 18 genes is split into 3 groups a, b and c according to the range of fold changes of DEGs. Fold-change was calculated based on the gene expression in the fiber cells relative to the epithelial cells. Negative values indicate expression lower in the fiber cells. **(a)** Seven genes with fold changes less than +/- 4. **(b)** Eight with fold changes less than +/- 8. **(c)** Three genes with fold changes from +/- 6 to +/- 153.

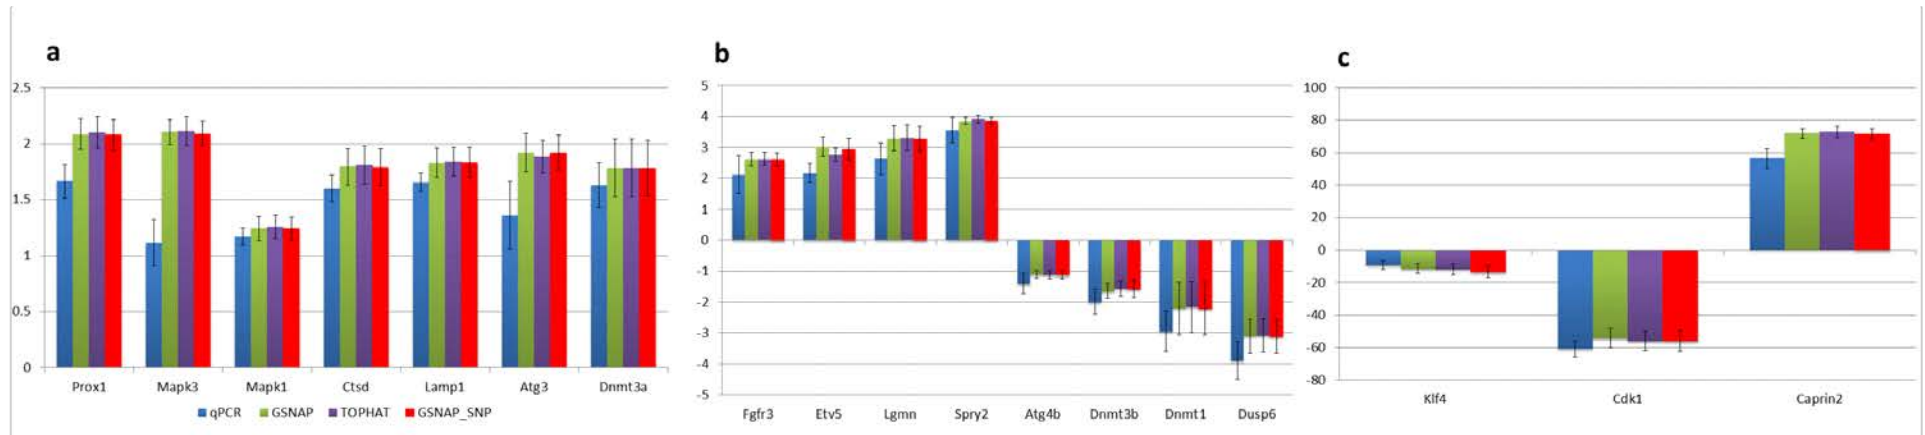

**Supplemental Figure S7: The fold change of 18 differentially expressed genes (DEGs) as identified by DESeq for CADBURE selected alignment result (GSNAP with SNP tolerance), GSNAP and TopHat2 was compared with qRT-PCR.**

The comparison for 18 genes is split into 3 groups a, b and c according to the range of fold changes of DEGs. Fold-change was calculated based on the gene expression in the fiber cells relative to the epithelial cells. Negative values indicate expression lower in the fiber cells. (a) Seven genes with fold changes less than +/- 4. (b) Eight with fold changes less than +/- 8. (c) Three genes with fold changes from +/- 6 to +/- 153.

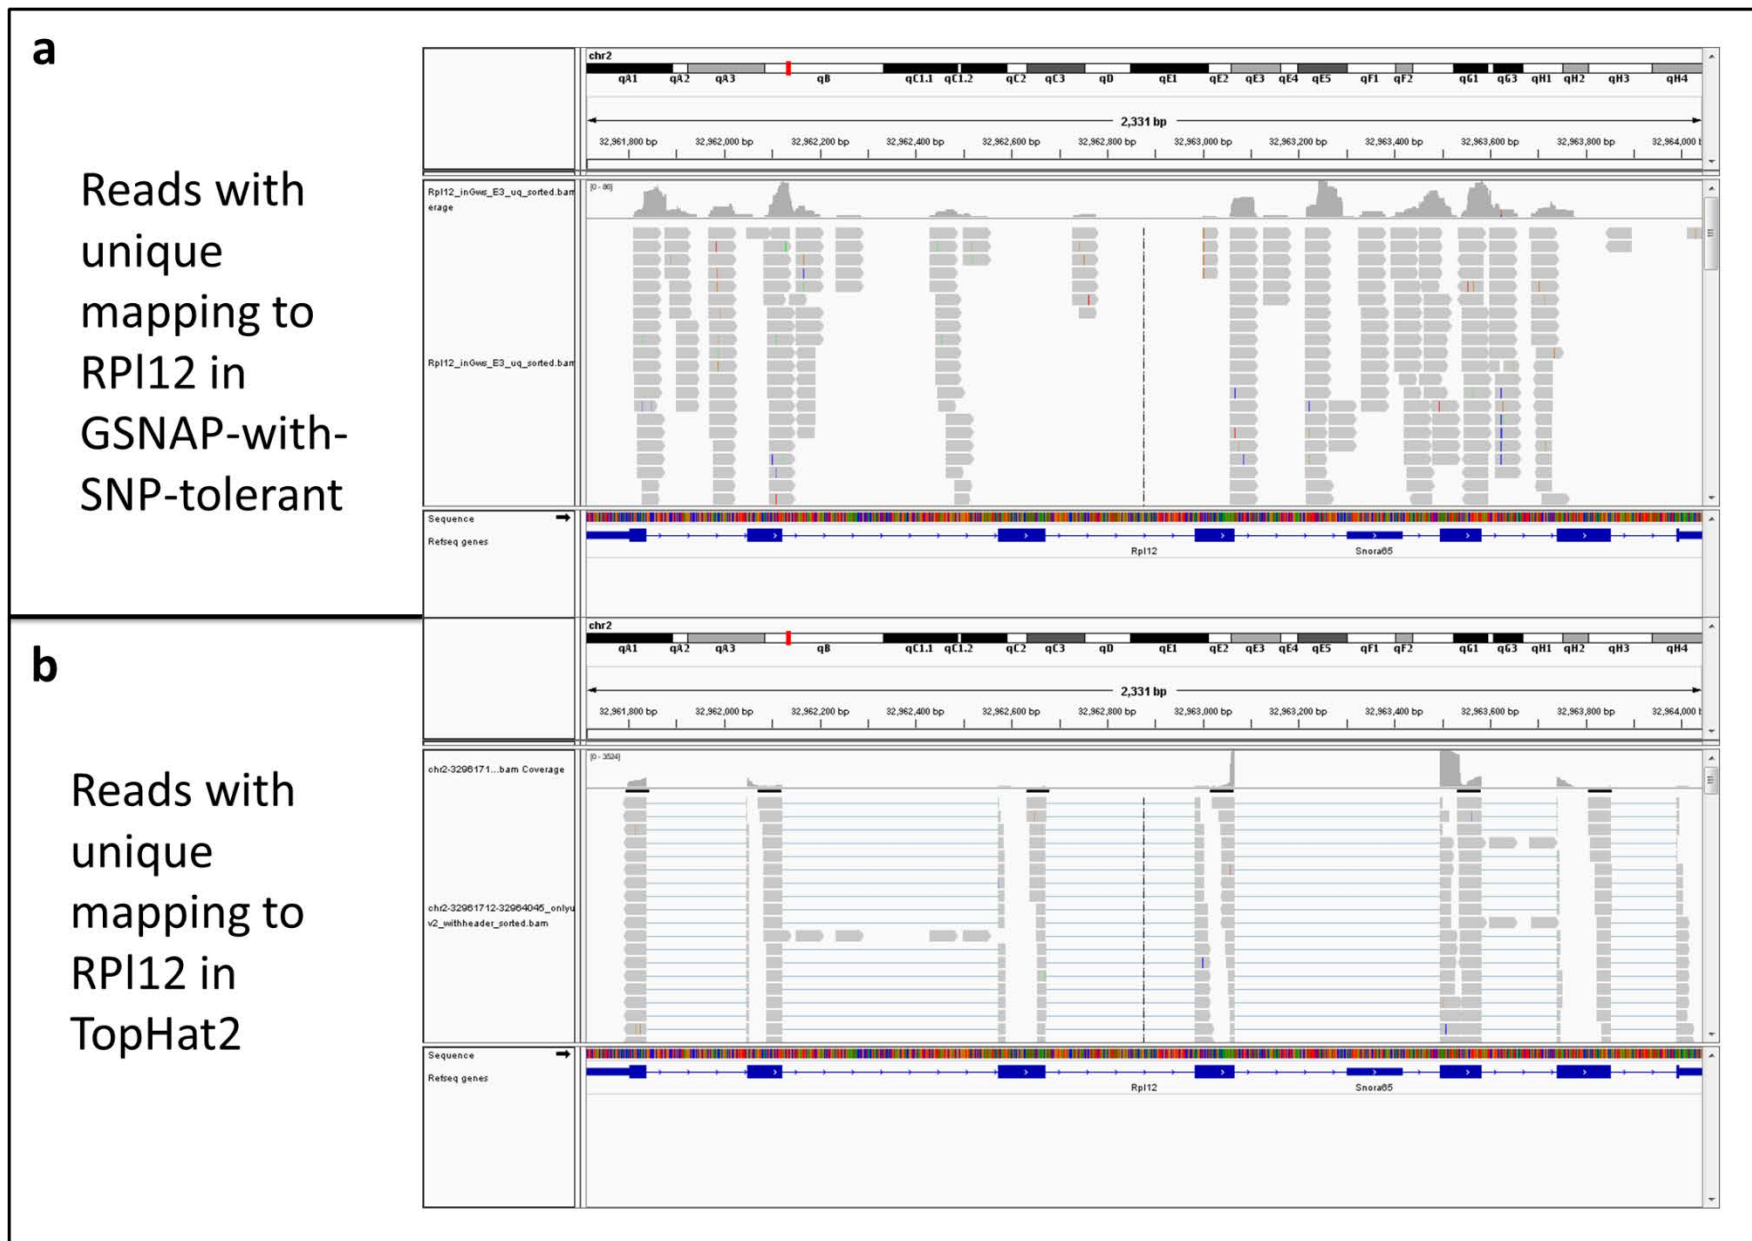

Supplemental Figure S8: IGV (Integrative Genome Viewer) snapshots of reads reported as uniquely aligned to gene RPI12 by GSNAP with SNP tolerance (a: CADBURE selected alignment result) versus TopHat2 (b: Non-CADBURE result).
